# Supplementary material for: Glycolipid antigen induces long-term natural killer T cell anergy in mice
Source: JCI journal article supplement (doi:10.1172/jci24762), 2005-08-25
Supplement: sd1 [file 1]

## Supplementary Materials:

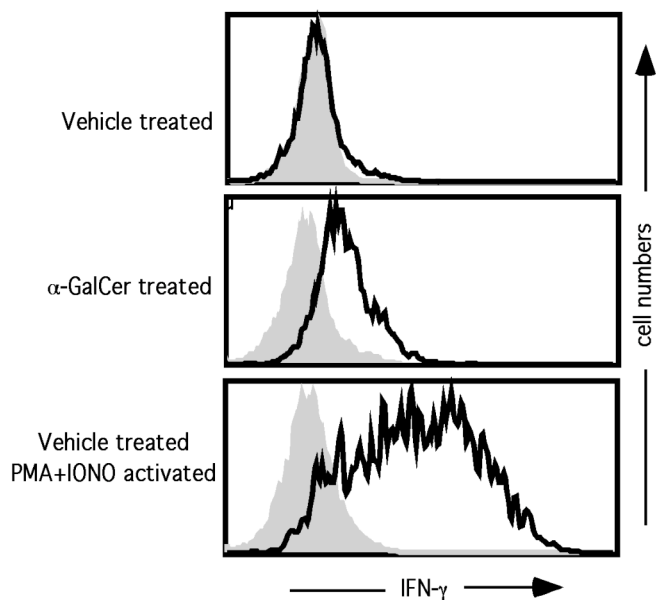

**Supplementary Figure 1.** IFN- $\gamma$  synthesis by NK cells. Mice were injected with vehicle or  $\alpha$ -GalCer. Twenty four hrs later, splenocytes were prepared, cultured with Golgi Plug<sup>TM</sup> for 6 h in the presence or absence of PMA plus ionomycin (IONO) and stained with anti-CD3-PerCP and anti-NK1.1-PE followed by anti-IFN- $\gamma$ -FITC (line) or FITC-labeled isotype control (shaded) mAb. Intracellular IFN- $\gamma$  expression by NK1.1<sup>high</sup>CD3<sup>-</sup> cells was evaluated. No IFN- $\gamma$  staining was obtained over the isotype control from NK cells in vehicle treated mice, whereas specific staining was obtained for  $\alpha$ -GalCer-injected mice, as well as for spleen cells from vehicle-injected mice treated with PMA+IONO.

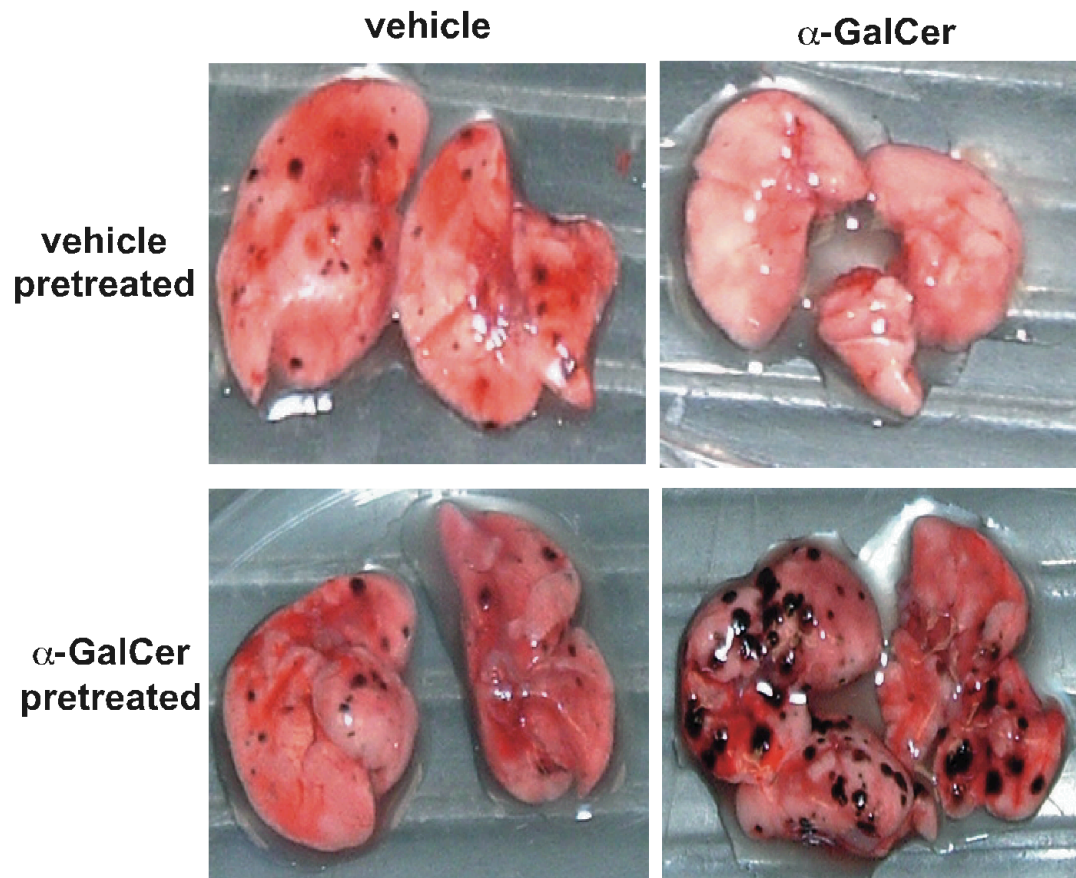

**Supplementary Figure 2.** Determination of B16 tumor lung metastases. B6 mice were injected with  $\alpha$ -GalCer or vehicle and one month later these animals were challenged i.v. with  $3 \times 10^5$  B16 melanoma cells. The mice were also treated with  $\alpha$ -GalCer (5  $\mu$ g/injection) or vehicle at 0, 4 and 8 days after the tumor challenge. A representative lung from each group is shown. Data are representative of 3 experiments with a total of at least 18 mice per group. Data are presented in a graphical format in Figure 4A.

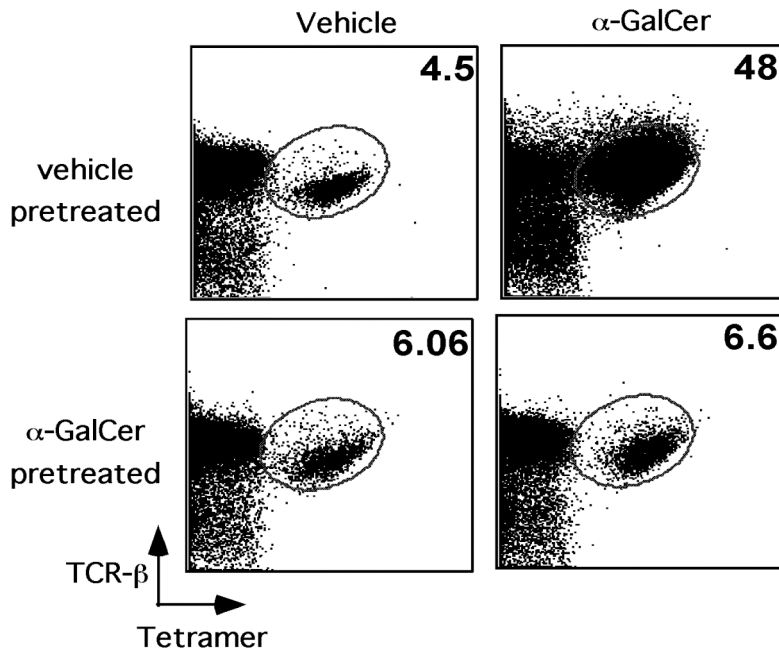

**Supplementary Figure 3.** Anergy induction is independent of IFN- $\gamma$ . IFN- $\gamma$ -deficient mice were injected with vehicle or  $\alpha$ -GalCer (5  $\mu$ g, i.p.), re-injected with vehicle or  $\alpha$ -GalCer 1 month later, sacrificed 3 days later, and the prevalence of NKT cells in the spleen was evaluated by flow cytometry. Representative data from 3 animals are shown. Data indicate that NKT cells from IFN- $\gamma$ -deficient mice that were injected 1 month earlier with  $\alpha$ -GalCer are refractory to  $\alpha$ -GalCer-induced expansion.

**Supplementary Table 1.**

$\alpha$ -GalCer can prevent EAE in mice injected one month earlier with a single dose of  $\alpha$ -GalCer.

| Pretreatment     | Treatment        | Number of mice | Disease Frequency | Mean onset of disease (days) | Mean maximum score | Mean Cumulative score |
|------------------|------------------|----------------|-------------------|------------------------------|--------------------|-----------------------|
| Vehicle          | Vehicle          | 16             | 100%              | 12±0                         | 4.18±0.18          | 103±3.7               |
| Vehicle          | $\alpha$ -GalCer | 10             | 30%               | 16.4±0.24                    | 0.5±0.16           | 7.4±3.8*              |
| $\alpha$ -GalCer | Vehicle          | 15             | 100%              | 12.4±0.28                    | 4.6±0.27           | 113.6±6.3             |
| $\alpha$ -GalCer | $\alpha$ -GalCer | 15             | 60%               | 15.5±0.5                     | 1.13±0.19          | 23.3±5.4*             |

B6 mice were injected with vehicle or  $\alpha$ -GalCer. One month later, EAE was induced as described in the Methods and animals were treated with  $\alpha$ -GalCer or vehicle. Data shown represents mean values± SE. A graphical presentation of the data is shown in Figure 4B.

\*, p < 0.0001 as compared with vehicle-treated group.
